# Supplementary material for: Investigation of Cross-Linked Chitosan-Based Membranes as Potential Adsorbents for the Removal of Cu2+ Ions from Aqueous Solutions
Source: MDPI journal article supplement (doi:10.3390/ma16051926), 2023-02-25
Supplement: s1 [file s1]

## Supplementary Material

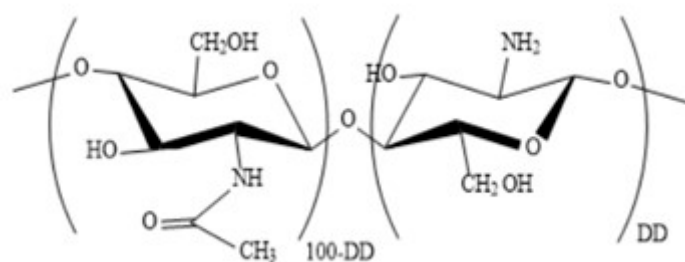

**Figure S1.** The chemical structure of chitosan.

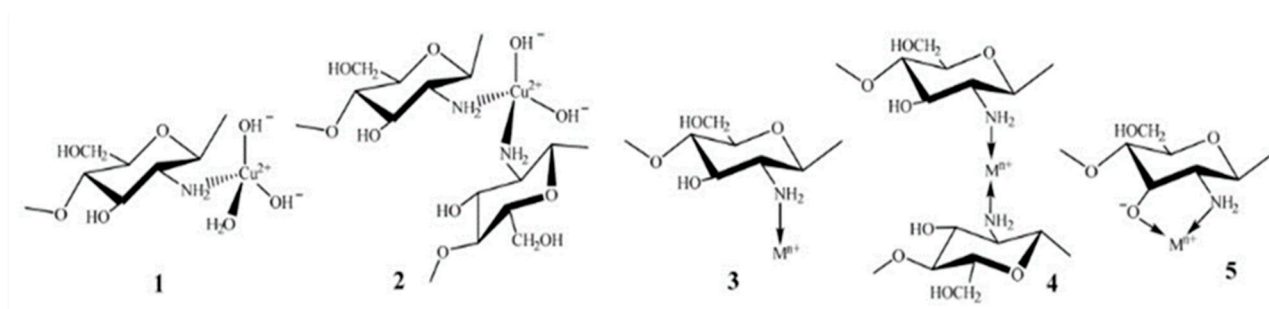

**Figure S2.** Schematic representation of intramolecular and intermolecular chelation of  $\text{Cu}^{2+}$  ions with chitosan units.

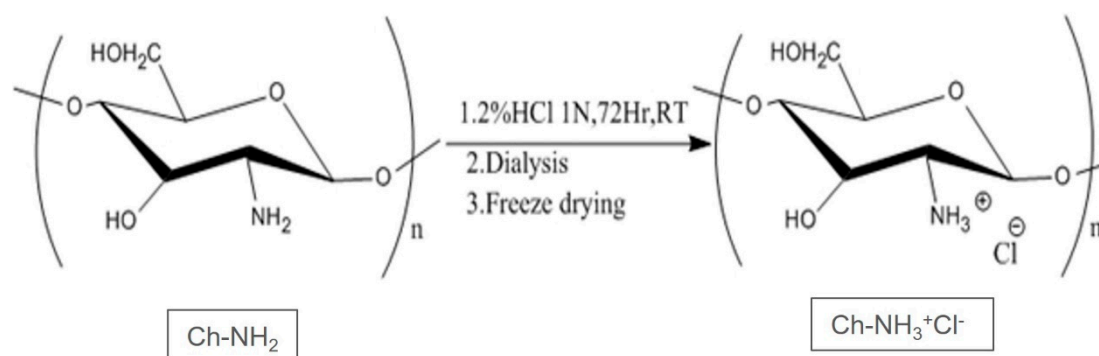

**Figure S3.** Preparation of chitosan hydrochloride,  $\text{Ch-NH}_3^+\text{Cl}^-$ .

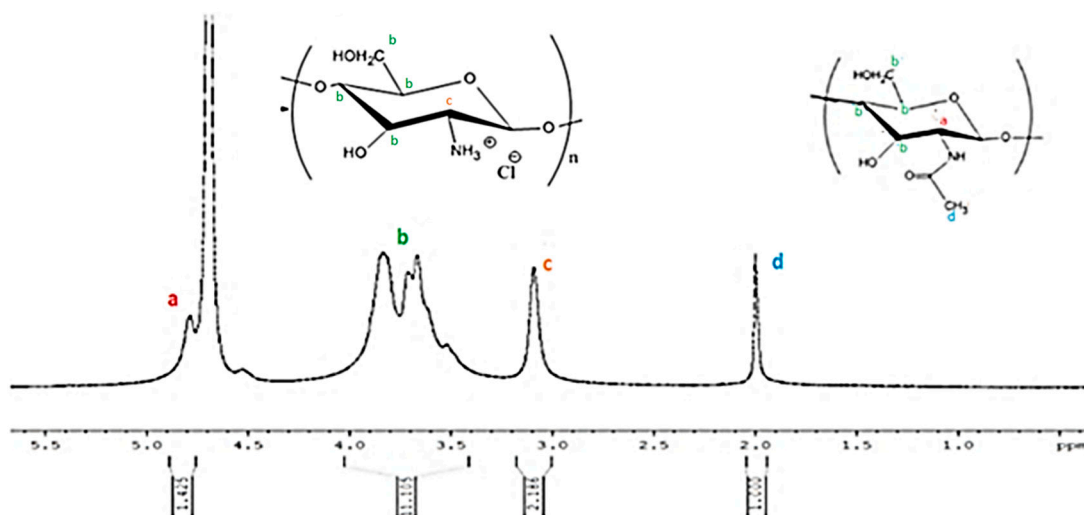

Figure S4.  $^1\text{H}$  NMR spectrum of chitosan hydrochloride,  $\text{Ch-NH}_3^+\text{Cl}^-$ .

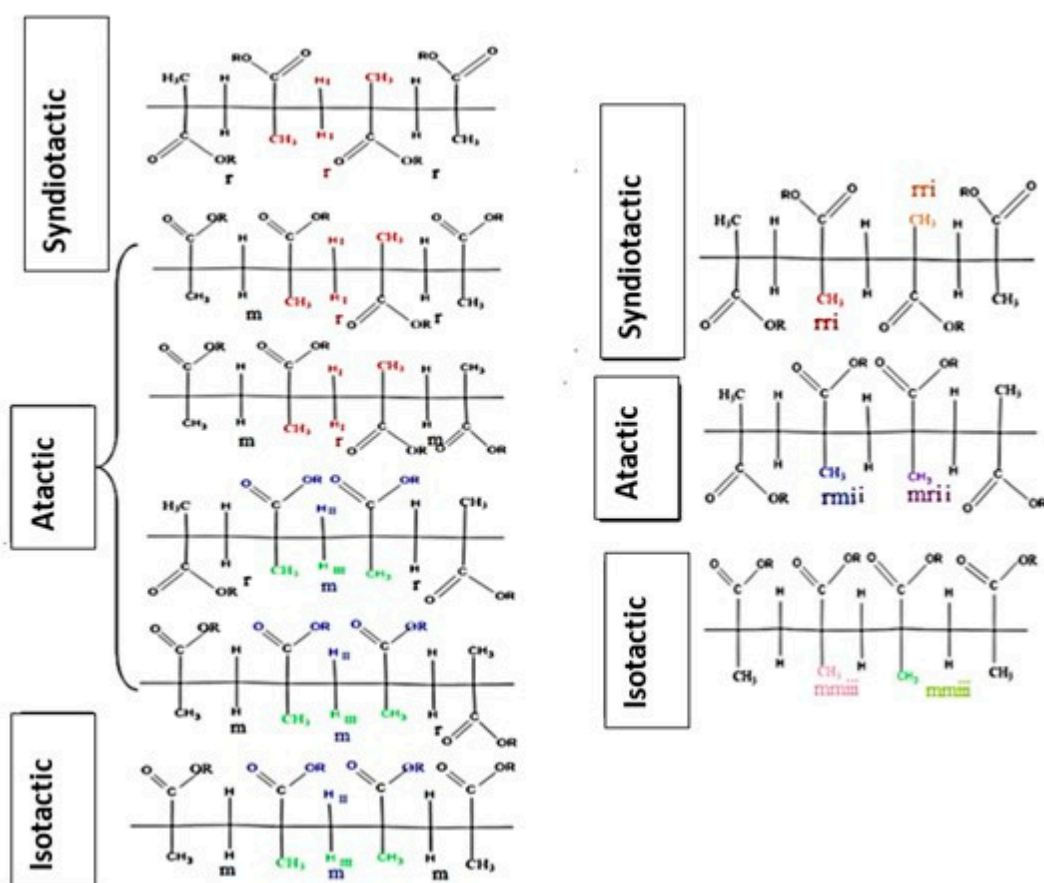

Figure S5. Schematic representation of stereochemical configurations of GMA units in PGMA, with respect to -H (left) και α-CH<sub>3</sub> (right), along the methacrylate polymer chain. (The more shielded -H or α-CH<sub>3</sub> is symbolized by "i" and the less shielded ones by "iii").

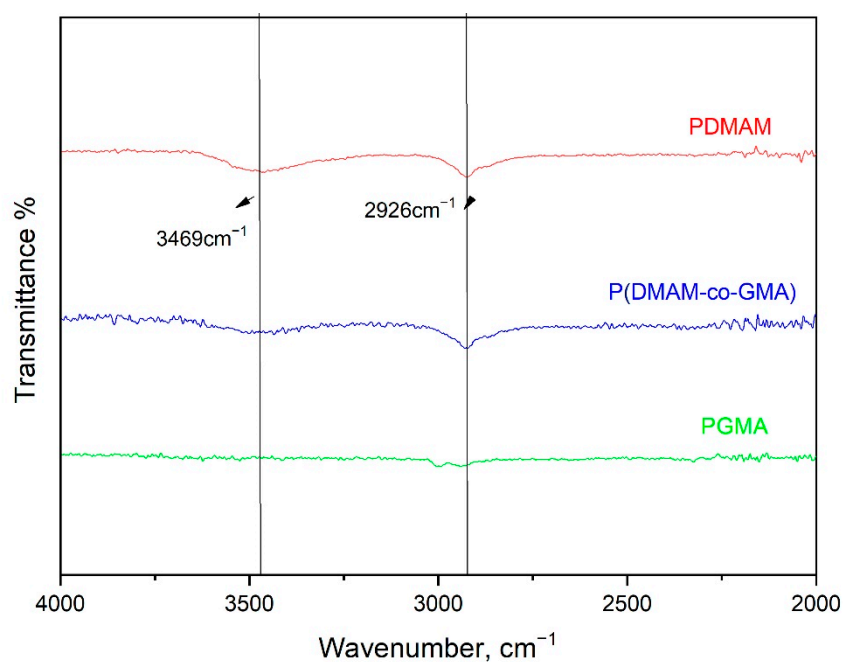

**Figure S6.** ATR-FTIR spectrum in the 2000-4000  $\text{cm}^{-1}$  region of the copolymer P(DMAM-co-GMA), in comparison with the spectra of the homopolymers PDMAM and PGMA.

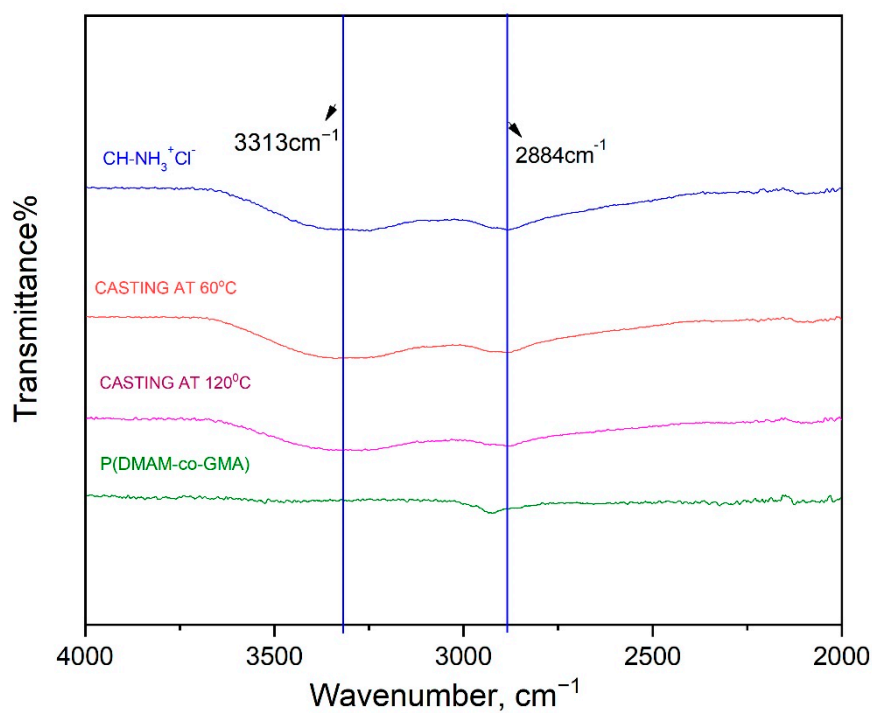

**Figure S7.** ATR-FTIR spectra in the 2000-4000  $\text{cm}^{-1}$  region of P(DMAM-co-GMA),  $\text{ChNH}_3^+\text{Cl}^-$  and the membrane  $\text{Ch-NH}_3^+\text{Cl}^-$  /P(DMAM- GMA) 9:1 after thermal treatment at 60°C and 120°C.

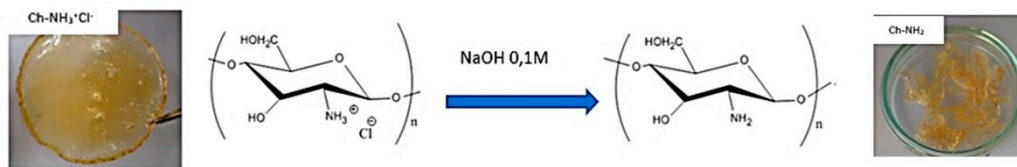

**Figure S8.** Schematic representation of deprotonation of Ch-NH<sub>3</sub><sup>+</sup>Cl<sup>-</sup>/P(DMAM-co-GMA) membranes after immersion in aqueous 0.1M NaOH solution for 24 hours at room temperature. The appearance of the Ch-NH<sub>3</sub><sup>+</sup>Cl<sup>-</sup>/P(DMAM-co-GMA) 8:2 membrane is shown, as example.

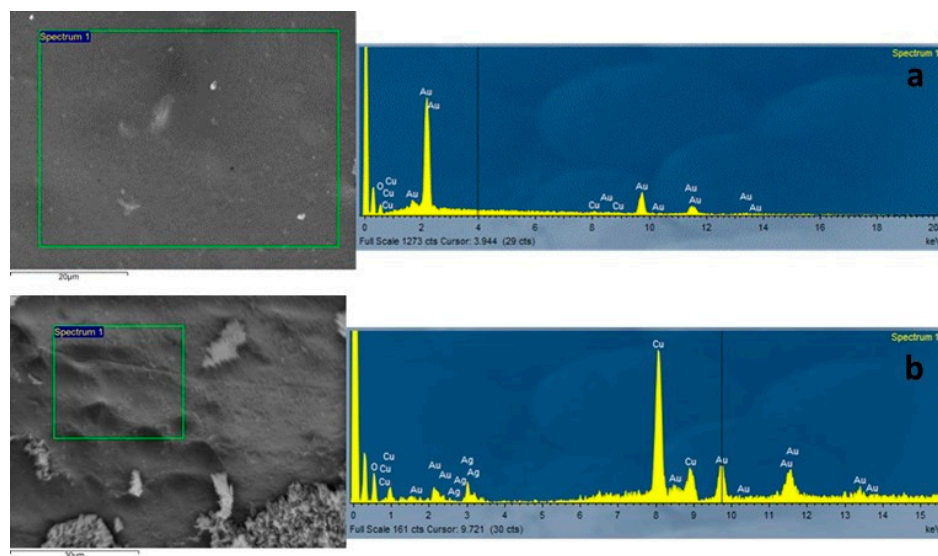

**Figure S9.** Surface morphology and EDS characterization of the Ch-NH<sub>2</sub>/P(DMAM-co-GMA) 7:3 membrane (a) after preparation and thermal crosslinking at 120 °C (scale bar: 20 μm), and (b) after adsorption of Cu<sup>2+</sup> ions (scale bar: 30 μm).

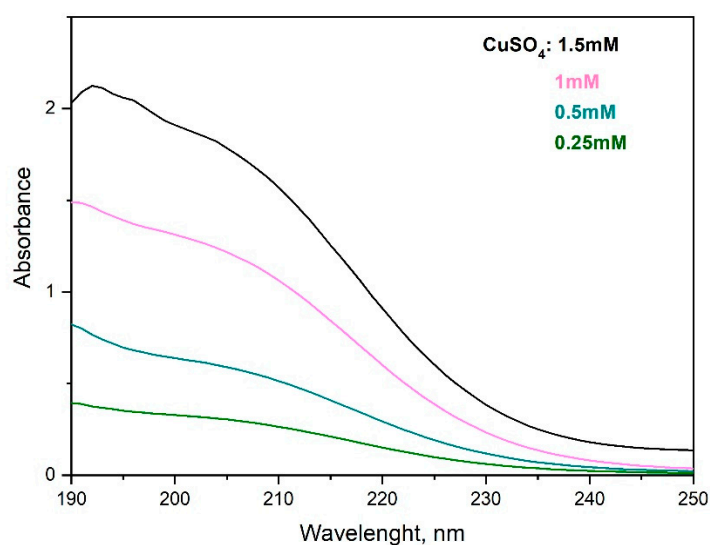

**Figure S10.** UV-Vis spectra of aqueous CuSO<sub>4</sub> solutions in the concentration range 0.25-1.5 mM.

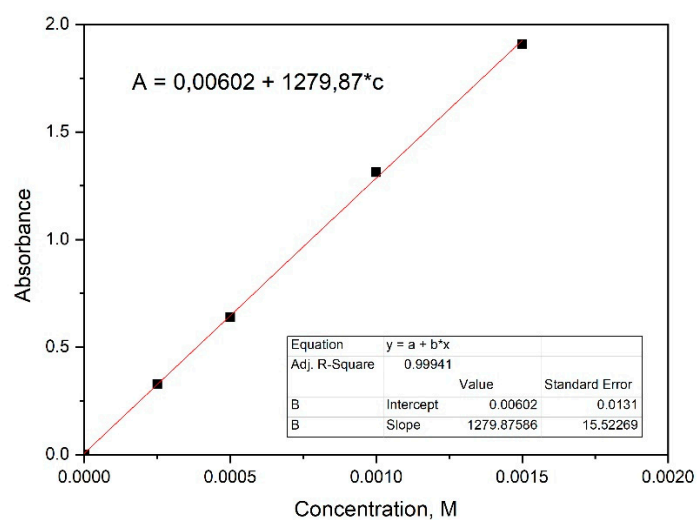

**Figure S11.** Calibration curve of the absorbance of aqueous  $\text{CuSO}_4$  solutions at 200nm.

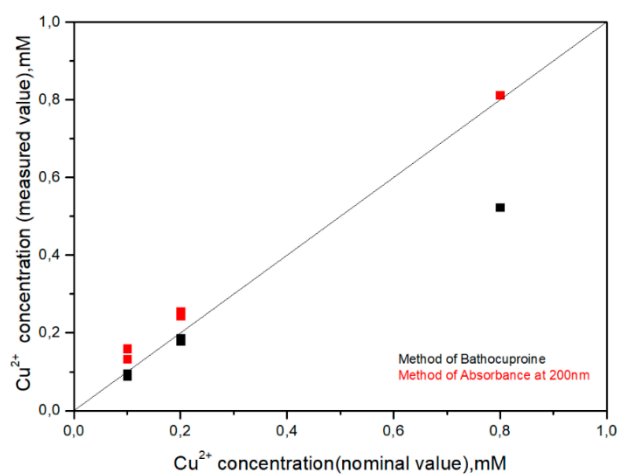

**Figure S12.** Comparative results of measured and nominal concentrations of aqueous  $\text{CuSO}_4$  solutions, using the Bathocuproine method and the method of absorbance at 200nm.

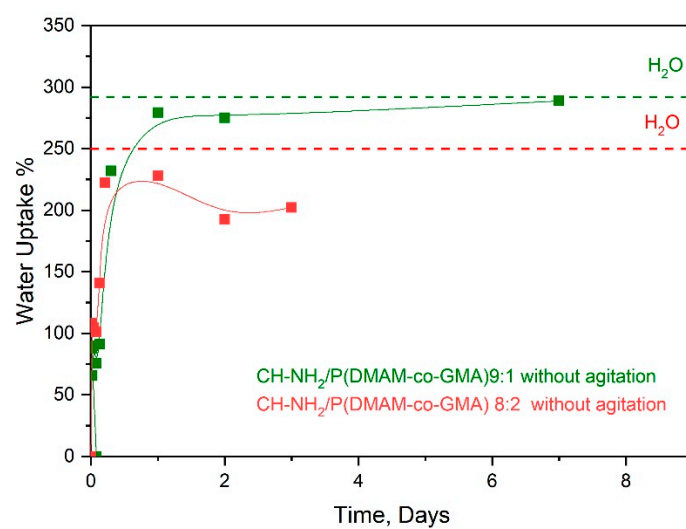

**Figure S13.** Water Uptake% of Ch-NH<sub>2</sub>/P(DMAM-co-GMA) 8:2 and 9:1 membranes as a function of immersion time in aqueous 1.5 mM CuSO<sub>4</sub>.
